# Supplementary material for: GALNT1 drives aggressive phenotypes of rheumatoid synoviocytes via NEK9 O-glycosylation
Source: JCI journal article supplement (doi:10.1172/jci.insight.198245), 2026-04-23

Figure 3C

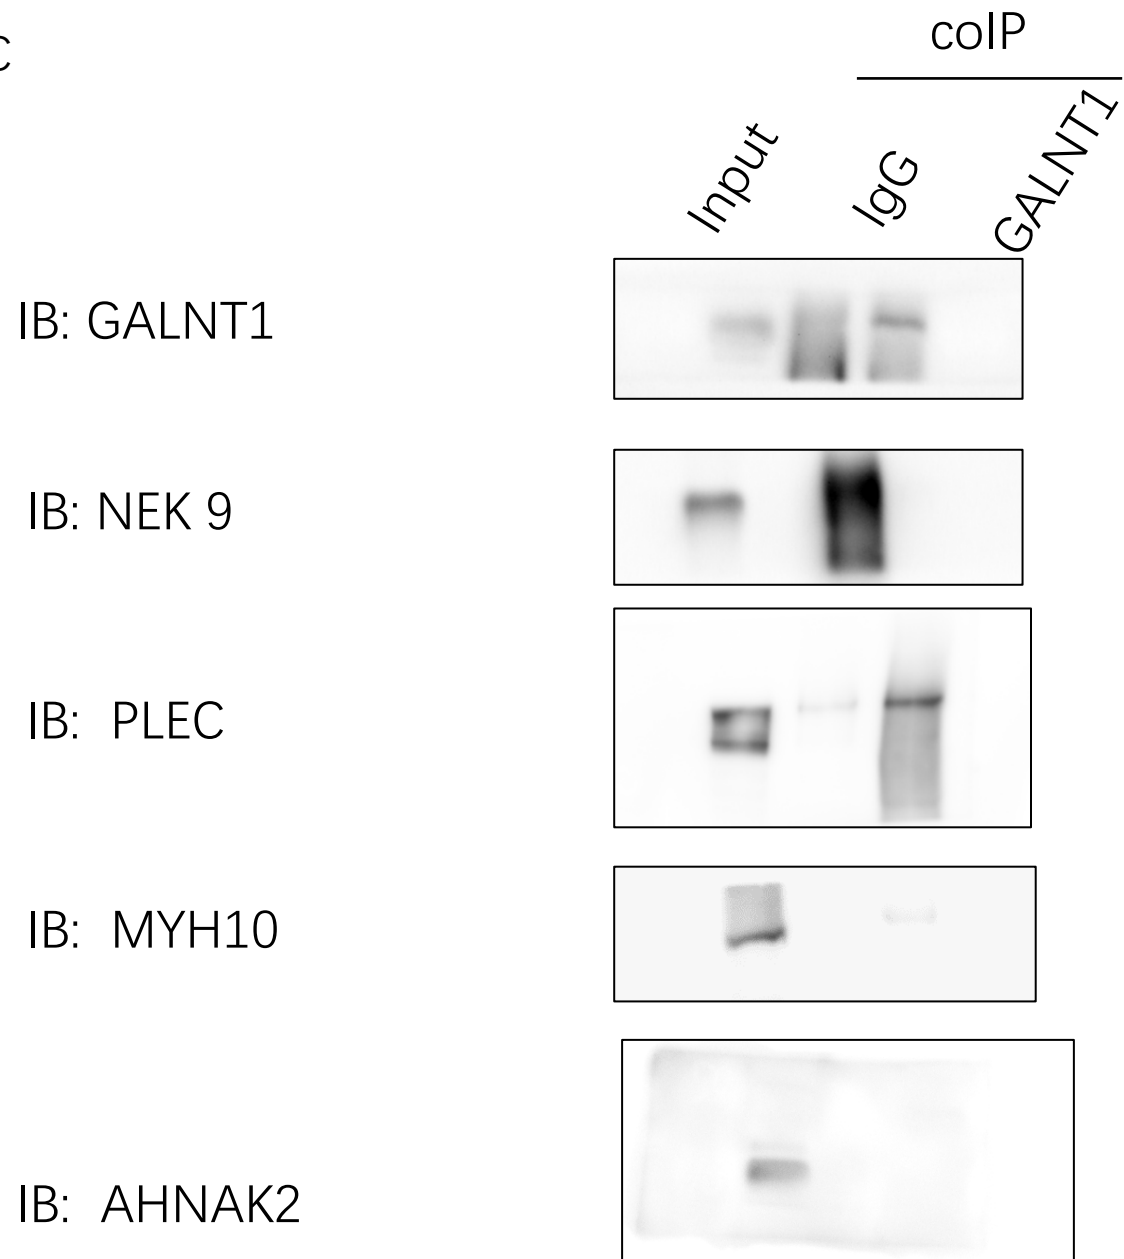

Figure 3D

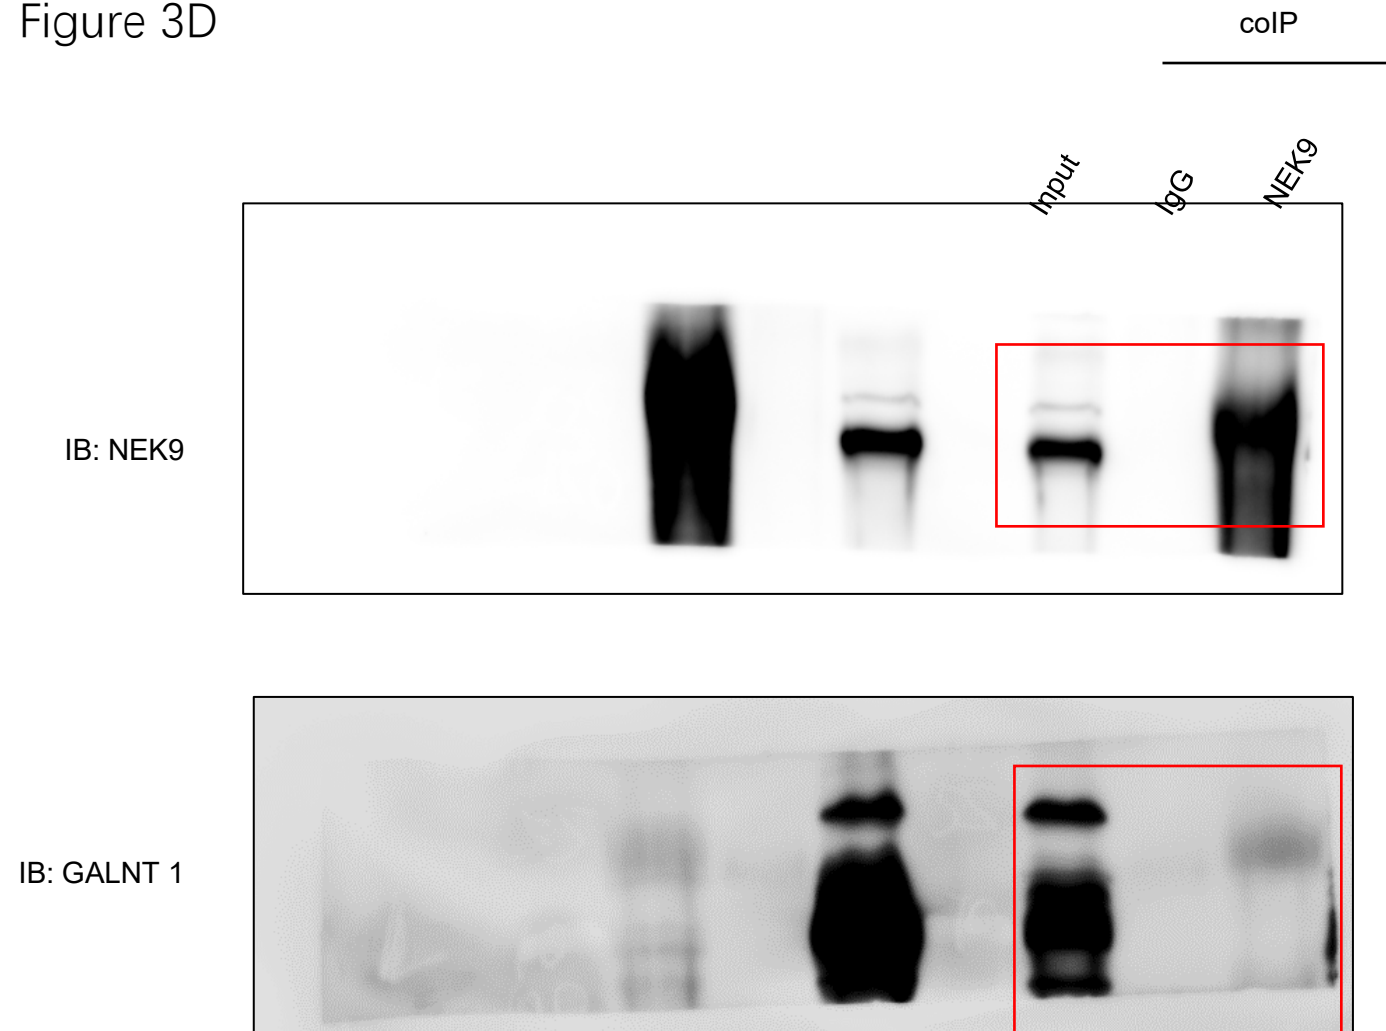

Figure 4C

NEK9

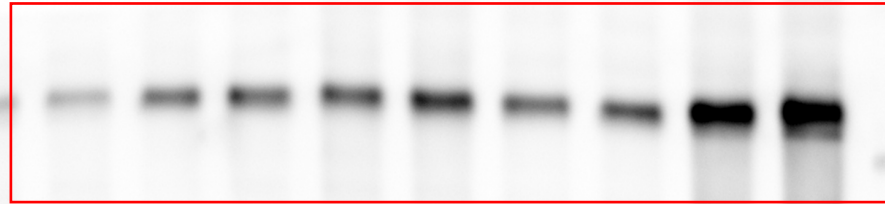

GAPDH

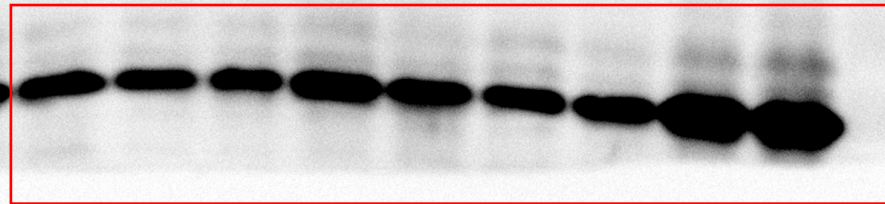

Figure 4D

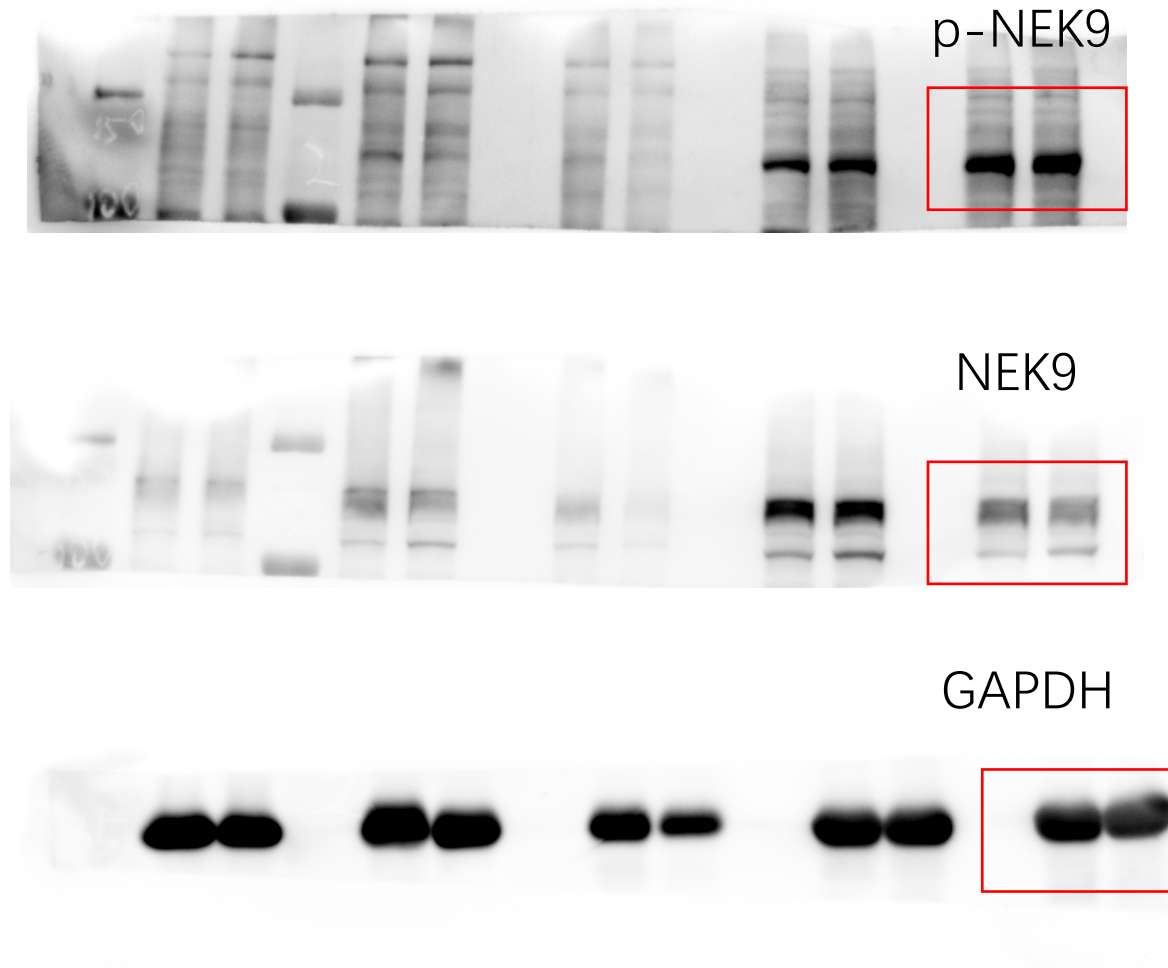

Figure 4E

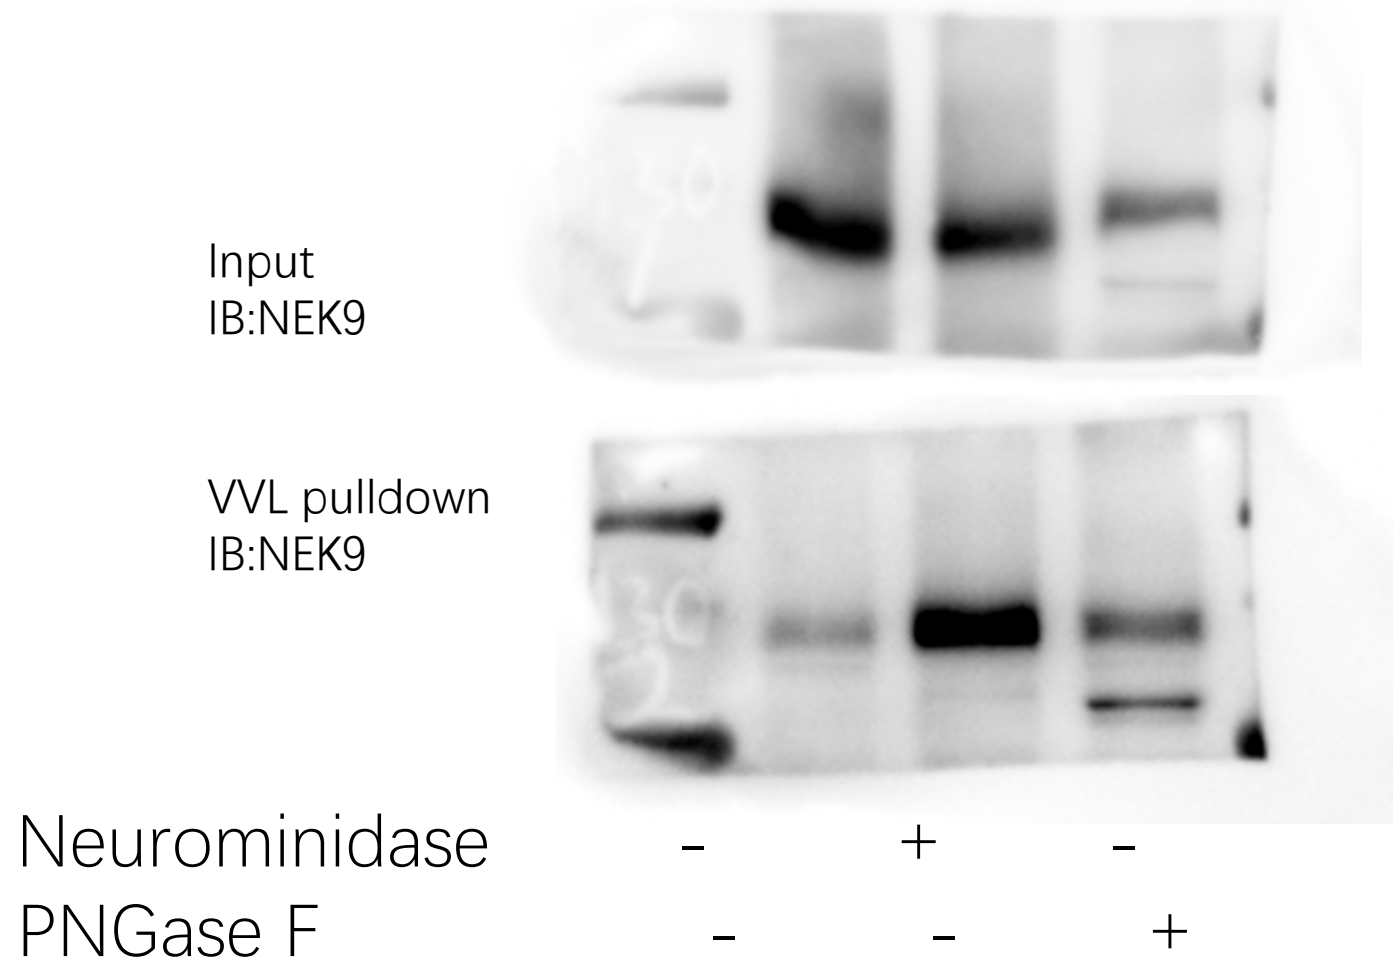

Figure 4F

Input  
IB:NEK9

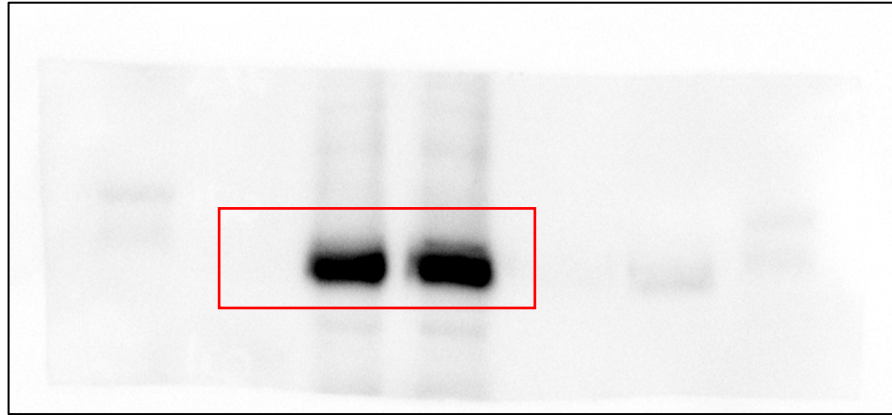

Input  
IB:GAPDH

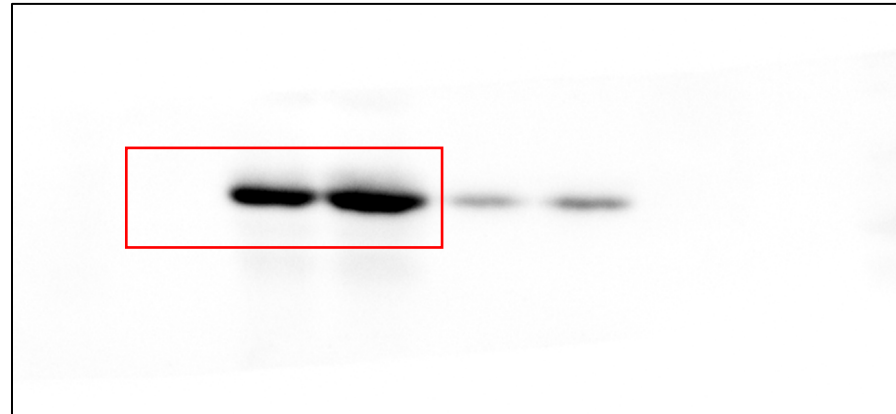

VVL  
pulldown  
IB:NEK9

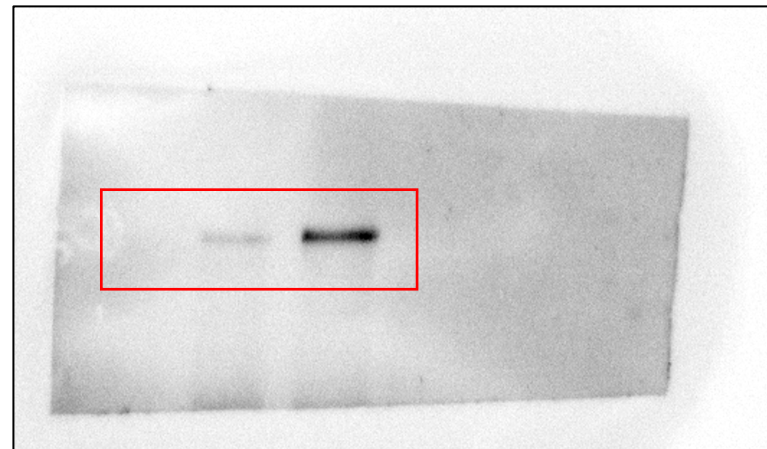

Figure 4G

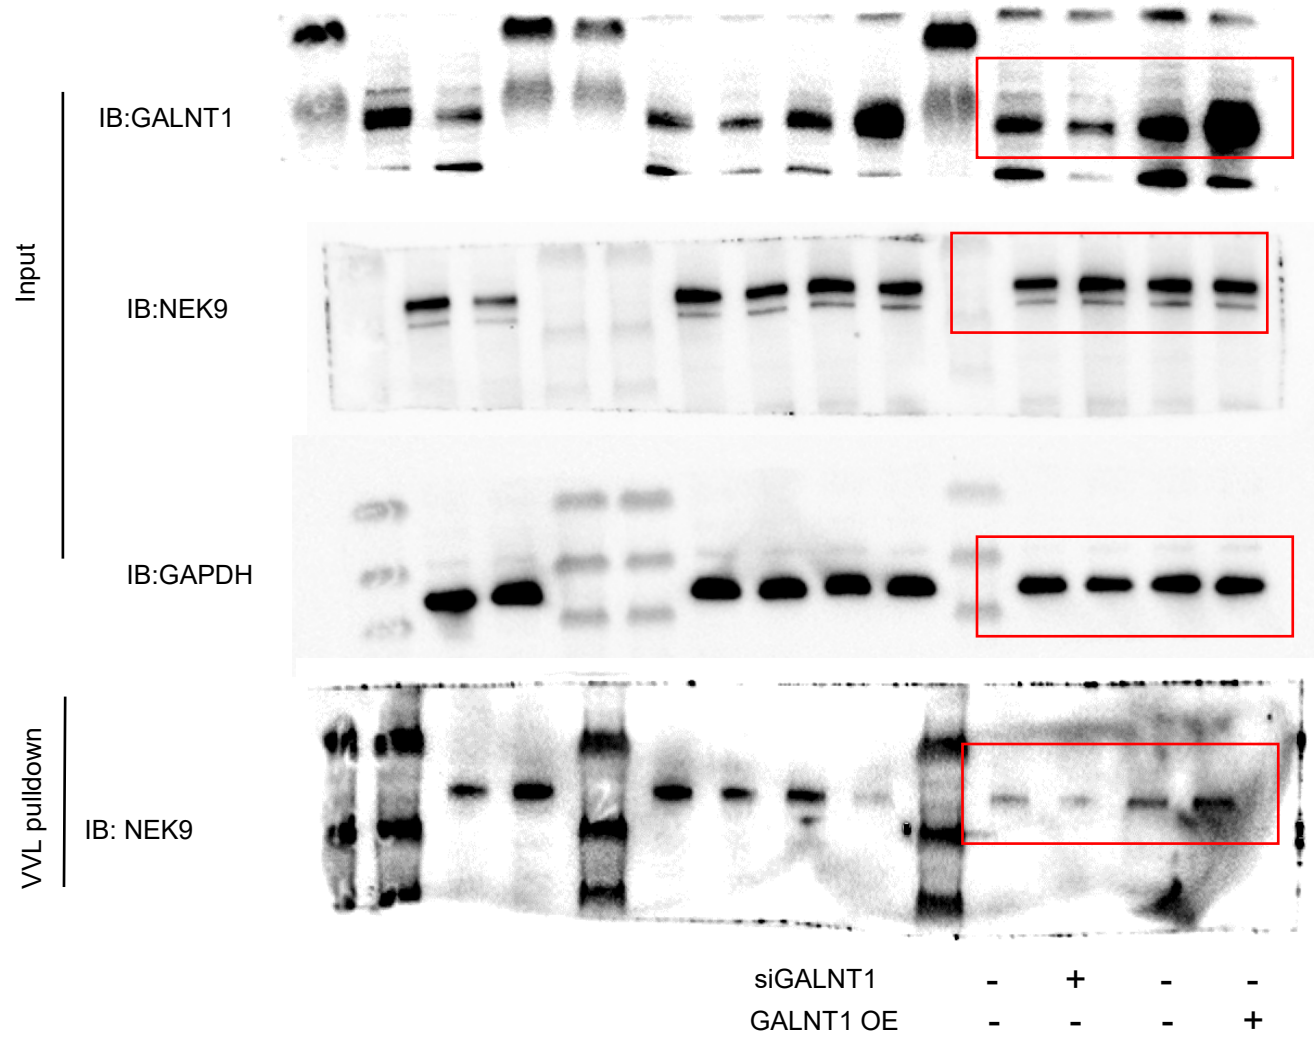

Figure 4H

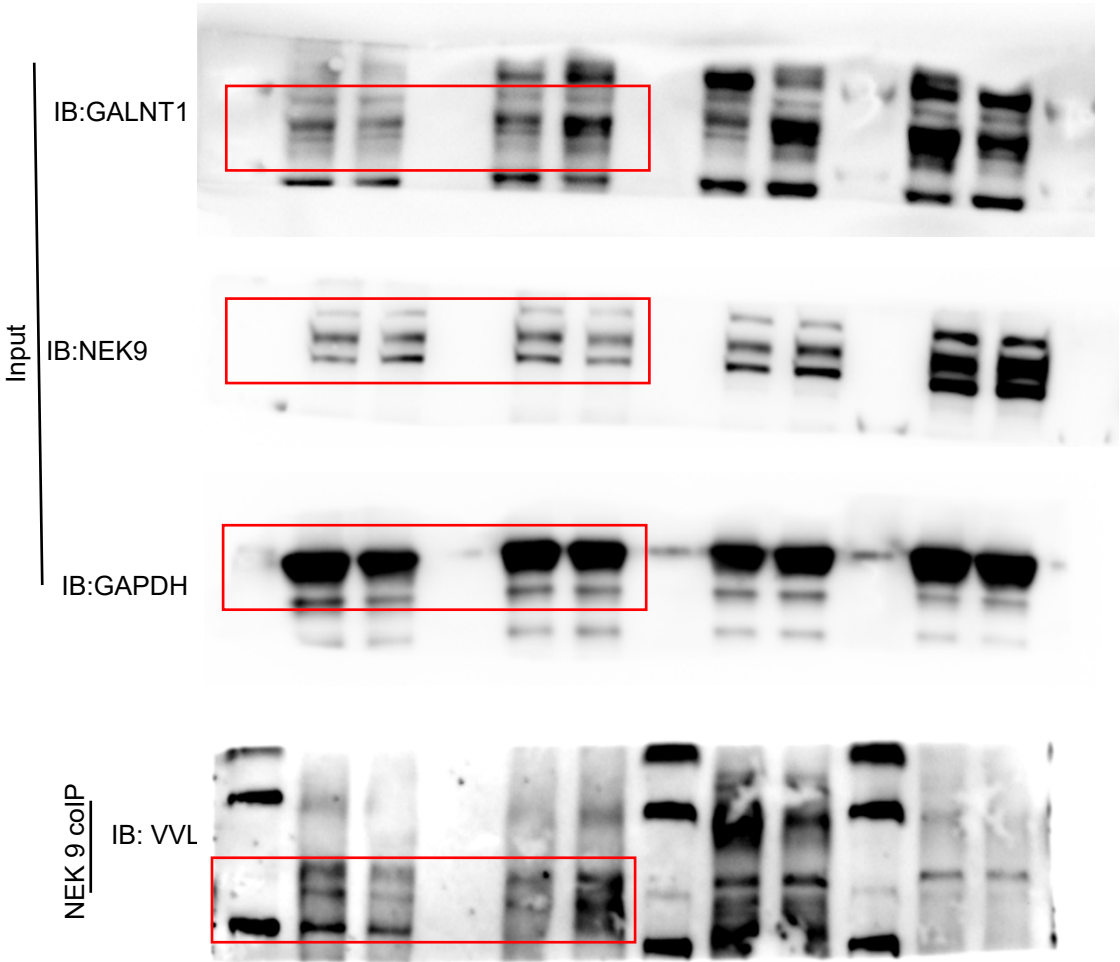

|           |   |   |   |   |
|-----------|---|---|---|---|
| siGALNT1  | - | + | - | - |
| GALNT1 OE | - | - | - | + |



Figure S4B

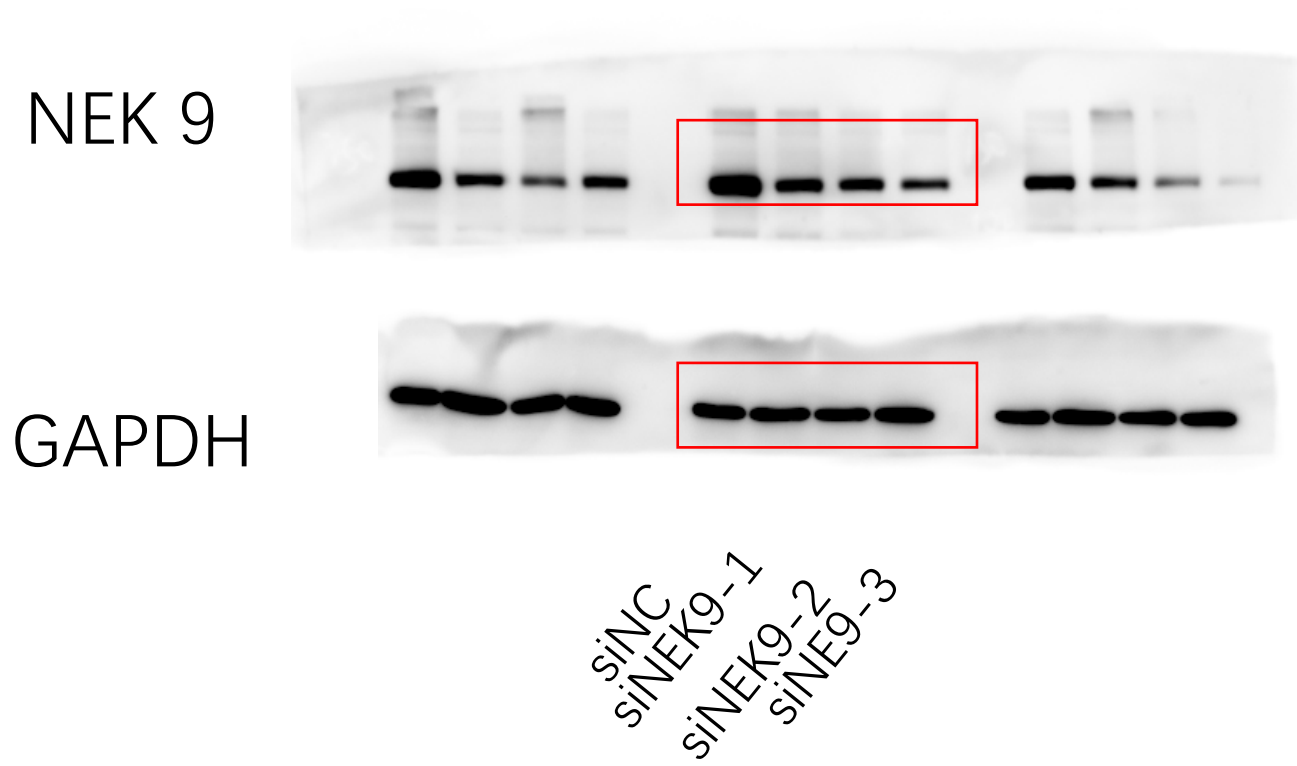

Supplement: sd1 [file 1]
