# Supplementary material for: GALNT1 drives aggressive phenotypes of rheumatoid synoviocytes via NEK9 O-glycosylation
Source: JCI journal article supplement (doi:10.1172/jci.insight.198245), 2026-04-23
Supplement: sd2 [file 2]

## Supplementary materials

### Supplementary figures and figure legend

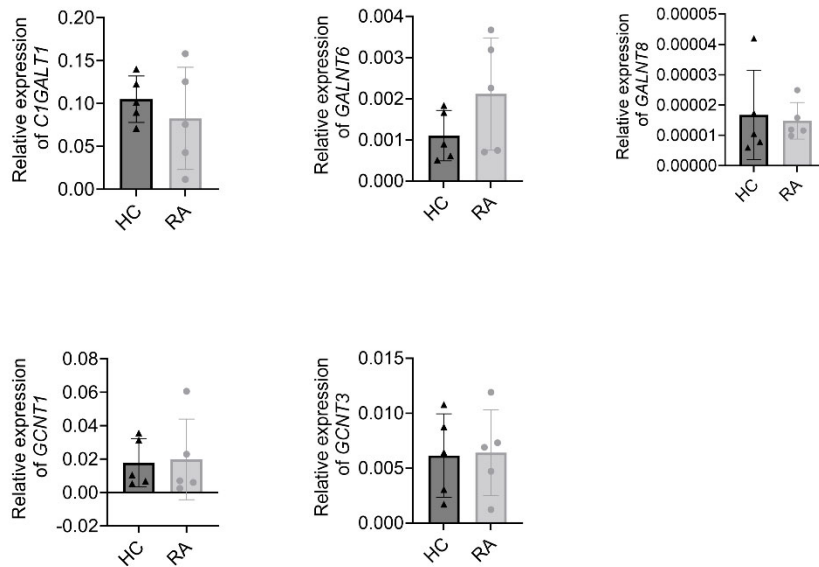

**Supplementary Fig. S1.** Expression levels of indicated genes in RA FLSs (n=5) and HC FLSs (n=5) groups were detected by qRT-PCR. Differences between RA (n=5) and HC (n=5) groups were analyzed using an unpaired t-test.

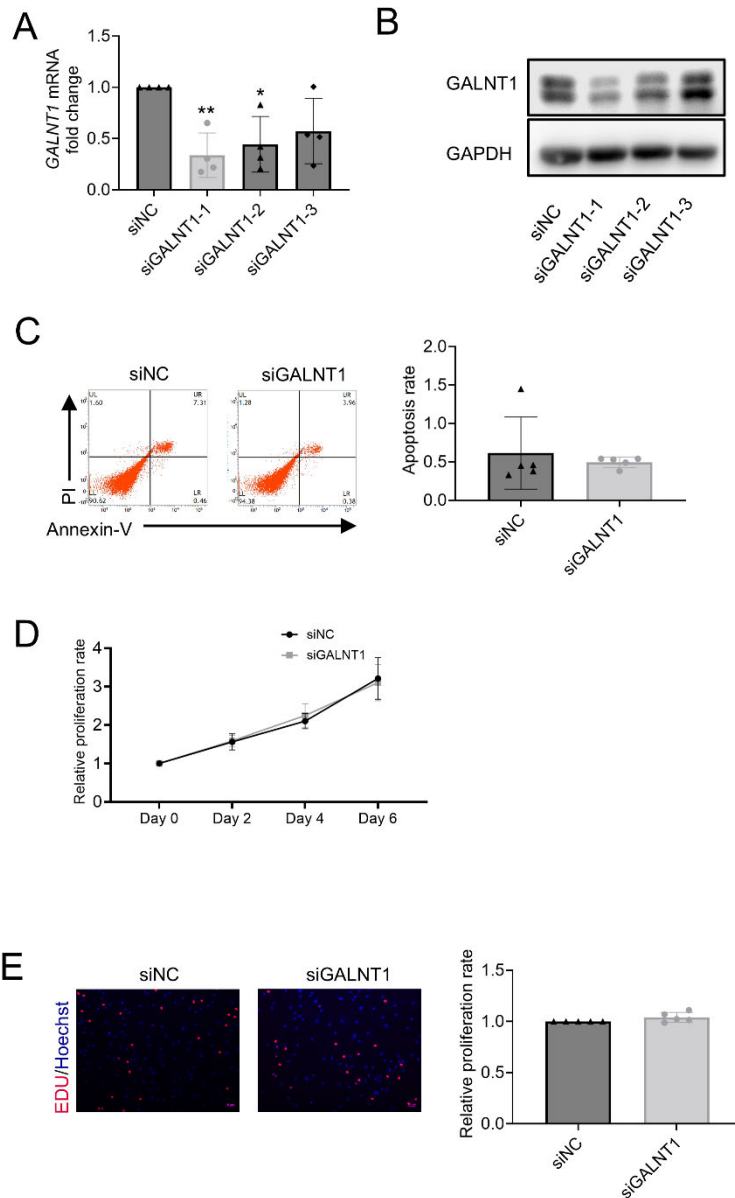

**Supplementary Fig. S2. Modulation of RA FLSs phenotype by GALNT1.** RA FLSs were transfected with siRNA targeting GALNT1 (siGALNT1) and negative control (siNC). n=4 independent experiments. Levels of GALNT1 mRNA (**A**) and protein (**B**) were measured by qRT-PCR or WB. GALNT1 targeting siRNA which showed the best silencing efficiency was used subsequently. (**C**). Flow cytometry analysis of apoptosis in RA FLSs transfected with control siRNA and GALNT1 targeting siRNA. n=5 independent experiments. (**D**) The growth curves of RA

FLSs were shown using CCK8 assay. n=4 independent experiments. (E) The EdU incorporation assay was adopted for the evaluation of the proliferation rate in RA FLS. Dividing cells incorporated EdU were labeled red and nuclei were stained blue with Hoechst 33342. Original magnification:  $\times 100$ . n=5 independent experiments. Data were normalized to the siNC control and analyzed by a one-sample t test (theoretical value = 1). Data are mean  $\pm$  SD. \* $P < 0.05$ , \*\* $P < 0.01$ .

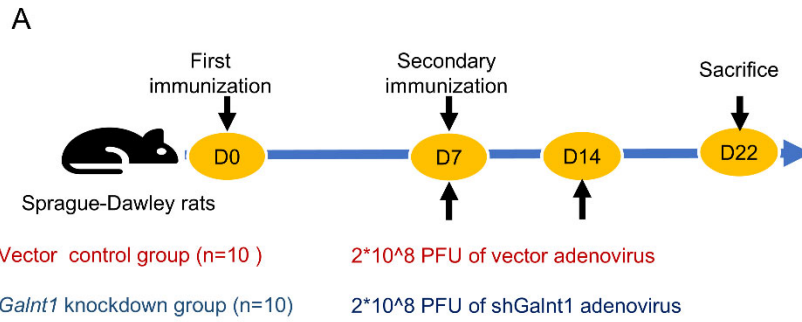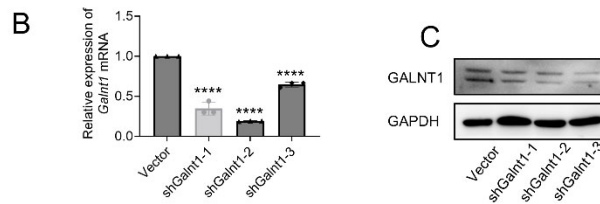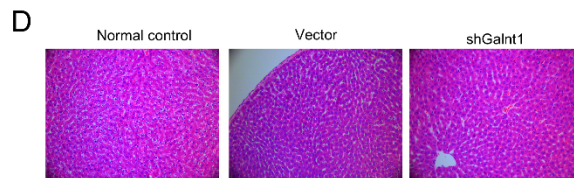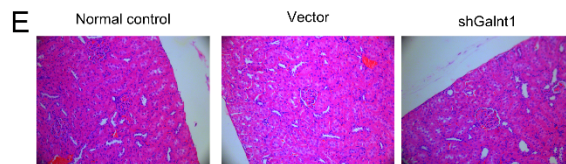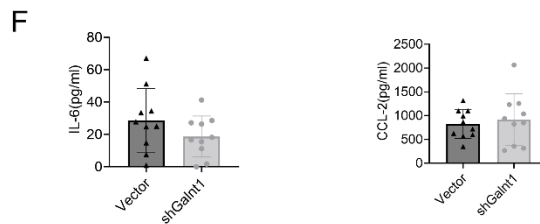

**Supplementary Fig. S3. (A) Schematic diagram of the CIA animal model**

induction and adenovirus treatments. Animals were randomized using a computer-based random order generator and divided into two groups (10 rats/group). CIA was induced CIA by two intradermal injections with an emulsion of bovine type II collagen and adjuvant at the base of the tail on days 0 and day 7. On day 7 and day

14,  $2 \times 10^8$  PFU of vector adenovirus or  $2 \times 10^8$  PFU of shGalnt1 adenovirus were injected intra-articular to each ankle of the rat. Articular index and ankle circumference were measured every other day since day 7 by an investigator unaware of treatment and the measurement order was randomized daily. FLSs isolated from rat CIA synovial tissues were infected with the indicated adenoviruses. Levels of Galnt1 mRNA (**B**) and GALNT1 protein (**C**) were measured by qRT-PCR and western blot respectively.  $n=3$  independent experiments. Data were normalized to the Vector control and analyzed by a one-sample t test (theoretical value = 1). The shGalnt1 adenovirus which showed the greatest silencing efficiency was used in the subsequent experiments. Effect of Galnt1 inhibition on the liver (**D**) and kidney (**E**) of CIA rats. Original magnification 100 $\times$ . (**F**) Effect of Galnt1 adenovirus on serum levels of cytokines in rat CIA model. For in vivo CIA experiments, rats were divided into normal control group ( $n=3$ ), CIA+Vector group ( $n=10$ ), and CIA+shGalnt1 group ( $n=10$ ). Data were analyzed using an unpaired t-test. The data are presented as the mean  $\pm$  SD. \*\*\*\* $P < 0.0001$ .

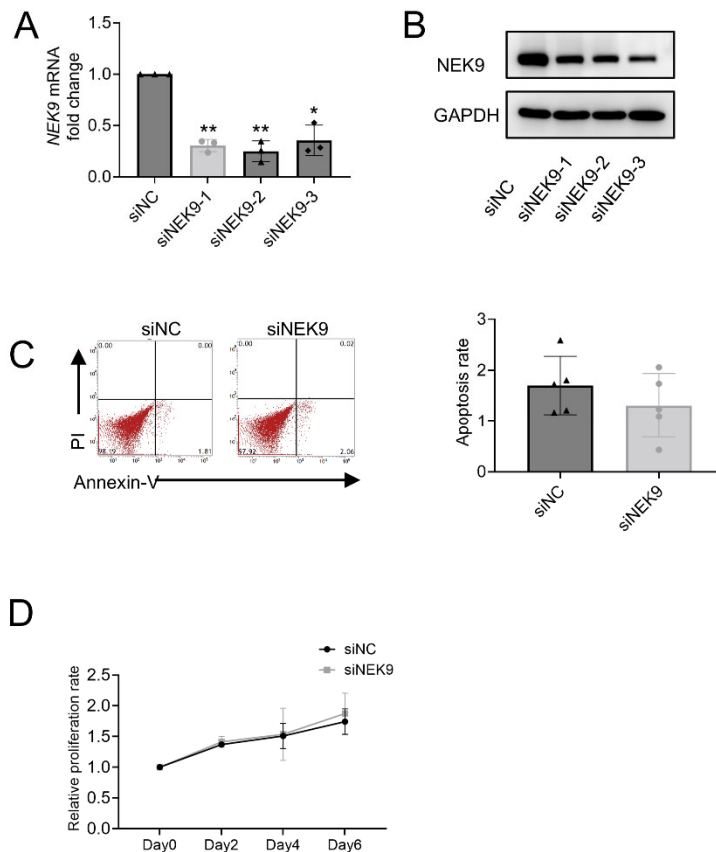

**Supplementary Fig. S4. Modulation of RA FLSs by NEK9 siRNA.** RA FLSs were transfected with siRNA targeting NEK9 (siNEK9) and negative control (siNC). Levels of NEK9 mRNA (**A**) and NEK9 protein (**B**) were measured by qRT-PCR or WB, respectively.  $n=3$  independent experiments. NEK9 targeting siRNA which showed the best silencing efficiency was used subsequently. (**C**). The effect of NEK9 siRNA on apoptosis in RA FLSs was detected using flow cytometry.  $n=5$  independent experiments. (**D**) The growth rate was measured by CCK8 assay conducted at the indicated time point.  $n=5$  independent experiments. Data were normalized to the siNC control and analyzed by a one-sample t test (theoretical value = 1). Data are mean  $\pm$  SD. \* $P < 0.05$ , \*\* $P < 0.01$ .

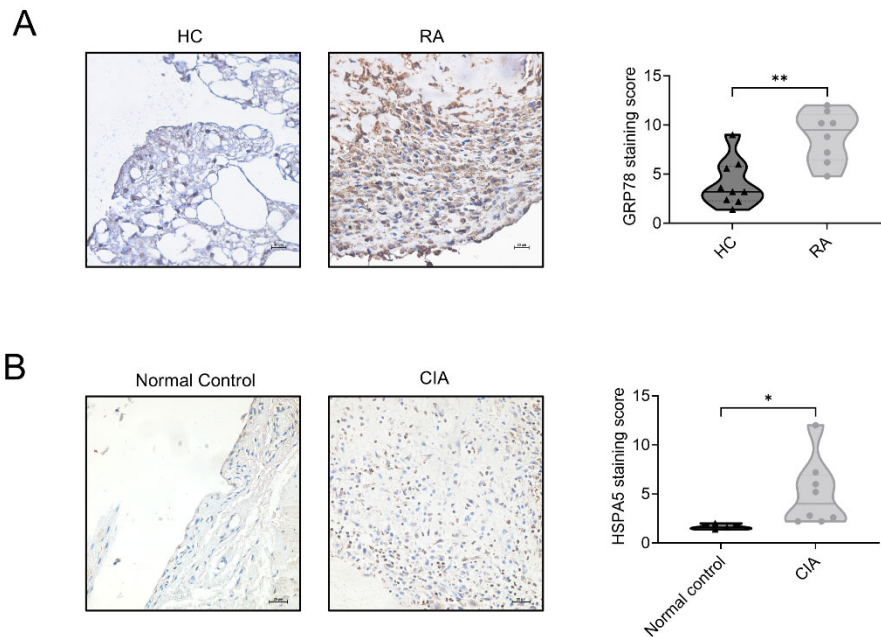

**Supplementary Fig. S5. Expression of GRP78 in synovial tissues.** (A) GRP78 expression in RA synovial tissues (n=8) and HC synovial tissues (n=9) measured by immunohistochemistry (IHC). Original magnification: 400 $\times$ . Semiquantitative analysis was performed for the evaluation of GALNT1 expression in synovial tissues. Differences were analyzed using the Mann–Whitney U test. (B) Detection of GRP78 in synovial tissues of normal control rats (n=3) and CIA rats (n=8) by IHC staining. Original magnification: 200 $\times$ . Semiquantitative evaluation was performed. Differences were analyzed using the Mann–Whitney U test. The data are presented as the mean  $\pm$  SD. \*P < 0.05, \*\*P < 0.01, \*\*\*P < 0.001.

## Supplementary tables

Table S1 Genes in the mucin-type O-glycan biosynthesis pathway identified by microarray

| Gene Symbol    | Gene product                                                                                   | Seqname         | Fold Change (RA/HC) | BH-corrected P Value |
|----------------|------------------------------------------------------------------------------------------------|-----------------|---------------------|----------------------|
| <i>GCNT1</i>   | beta-1,3-galactosyl-O-glycosyl-glycoprotein beta-1,6-N-acetylglucosaminyltransferase           | NM_001490       | 2.0353394           | 0.014059             |
| <i>GCNT3</i>   | beta-1,3-galactosyl-O-glycosyl-glycoprotein beta-1,6-N-acetylglucosaminyltransferase 3         | NM_004751       | 10.5639266          | 0.000112             |
| <i>GALNT8</i>  | probable polypeptide N-acetylgalactosaminyltransferase 8                                       | NM_017417       | 2.4642617           | 0.020388             |
| <i>GALNT6</i>  | UDP-N-acetyl-alpha-D-galactosamine:polypeptide N-acetylgalactosaminyltransferase 6 (GalNAc-T6) | ENST00000356317 | 11.609947           | 0.000487             |
| <i>GALNT1</i>  | polypeptide N-acetylgalactosaminyltransferase 1                                                | NM_020474       | 4.2919641           | 0.000633             |
| <i>CIGALT1</i> | core 1 synthase, glycoprotein-N-acetylgalactosamine 3-beta-galactosyltransferase, 1            | ENST00000436587 | 2.4338283           | 0.002628             |

Table S2 Correlation between GALNT1 expression in synovium and parameters of RA disease

|                  | GALNT1 staining score |              |
|------------------|-----------------------|--------------|
|                  | r                     | P            |
| Age              | -0.051                | 0.685        |
| Disease duration | -0.150                | 0.230        |
| ESR              | 0.188                 | 0.130        |
| CRP              | <b>0.300*</b>         | <b>0.014</b> |
| RF               | 0.066                 | 0.599        |
| ACPA             | -0.048                | 0.703        |
| DAS28            | 0.098                 | 0.434        |
| SDAI             | 0.039                 | 0.758        |
| CDAI             | -0.043                | 0.732        |
| mTSS             | -0.043                | 0.733        |

ESR, erythrocyte sedimentation rate; CRP, C-reactive protein; RF, rheumatoid factor; ACPA, anti-cyclic citrullinated peptide antibody; DAS28-CRP, disease activity score in 28 joints with four variables including C-reactive protein; SDAI, simplified disease activity index; CDAI, clinical disease activity index; mTSS, modified total Sharp score.

Table S3 The top 10 proteins identified to be associated with GALNT1

| GeneSymbol | Sum PEP Score | GeneSymbol | Sum PEP Score |
|------------|---------------|------------|---------------|
| AHNAK2     | 885.154       | ACAN       | 232.272       |
| MYH10      | 417.269       | EML3       | 203.392       |
| PLEC       | 372.04        | EIF5B      | 182.705       |

|       |         |       |         |
|-------|---------|-------|---------|
| NEK9  | 355.379 | MYO1D | 176.351 |
| PRDX1 | 300.201 | DTX3L | 167.03  |

Table S4 Predicted O-glycosylated sites in NEK9 protein.

| Site | Score    | Site | Score    | Site | Score    |
|------|----------|------|----------|------|----------|
| 2    | 0.561206 | 344  | 0.727938 | 793  | 0.5      |
| 13   | 0.567407 | 346  | 0.629937 | 795  | 0.599281 |
| 16   | 0.5      | 347  | 0.807671 | 801  | 0.623201 |
| 20   | 0.538102 | 357  | 0.710394 | 805  | 0.685142 |
| 22   | 0.648516 | 370  | 0.574277 | 829  | 0.549895 |
| 28   | 0.845909 | 385  | 0.514227 | 832  | 0.623414 |
| 29   | 0.942827 | 413  | 0.792304 | 836  | 0.770641 |
| 33   | 0.946418 | 585  | 0.691736 | 838  | 0.546387 |
| 35   | 0.953513 | 685  | 0.696315 | 842  | 0.65681  |
| 320  | 0.805786 | 687  | 0.728896 | 855  | 0.815481 |
| 326  | 0.932299 | 693  | 0.678781 | 868  | 0.788056 |
| 331  | 0.894542 | 748  | 0.757548 | 869  | 0.866785 |
| 332  | 0.960542 | 750  | 0.562255 | 877  | 0.855097 |
| 333  | 0.807625 | 771  | 0.619472 | 883  | 0.625933 |
| 335  | 0.938482 | 775  | 0.790527 | 944  | 0.622245 |
| 343  | 0.787154 | 781  | 0.542924 | 947  | 0.552266 |

Table S5 Demographic and clinical characteristics of RA patients

| c                                  | RA patients (n=66) | HC controls(n=19) |
|------------------------------------|--------------------|-------------------|
| Age, yrs, median (IQR)             | 50.5 (45.75~60.25) | 45(34~60)         |
| Female, n (%)                      | 52 (78.8)          | 10(52.6)          |
| Disease duration, mo, median (IQR) | 24 (7~84)          |                   |
| ESR, (mm/h), median (IQR)          | 70 (50~101.3)      |                   |
| CRP, (mg/L), median (IQR)          | 36.1 (16.7~60.53)  |                   |
| RF, (IU/ml), median (IQR)          | 242.5 (45.5~562.8) |                   |
| ACPA, (IU/ml), median (IQR)        | 167.5 (24.25~300)  |                   |
| DAS28-CRP, median (IQR)            | 5.38 (4.575~6.1)   |                   |
| SDAI, median (IQR)                 | 31.1 (21.88~42.19) |                   |
| CDAI, median (IQR)                 | 27 (18.75~39.25)   |                   |
| mTSS, median (IQR)                 | 10 (3~28)          |                   |
| Previous medications               |                    |                   |
| Glucocorticosteroids, n (%)        | 22 (33.3)          |                   |
| Methotrexate, n (%)                | 6 (9.1)            |                   |
| Leflunomide, n (%)                 | 8 (12.1)           |                   |
| Sulfasalazine, n (%)               | 7 (10.6)           |                   |
| Hydrochloroquine, n (%)            | 6 (9.1)            |                   |
| Biologic agents, n (%)             | 2 (3.0)            |                   |

ESR, erythrocyte sedimentation rate; CRP, C-reactive protein; RF, rheumatoid factor; ACPA, anti-cyclic citrullinated peptide antibody; DAS28-CRP, disease activity score in 28 joints with four variables including C-reactive protein; SDAI, simplified disease activity index; CDAI, clinical disease activity index; mTSS, modified total Sharp score.

Table S6 Sequences of siRNAs or shRNA

| Target sequences of siRNAs for human genes    |                     |                        |
|-----------------------------------------------|---------------------|------------------------|
| <i>GALNT1</i>                                 | si <i>GALNT1</i> -1 | GAACAACGTTCTGGATTGA    |
|                                               | si <i>GALNT1</i> -2 | GCAACCAACTCTGGGAGTA    |
|                                               | si <i>GALNT1</i> -3 | GTCCCATCATCGATGTGAT    |
| <i>NEK9</i>                                   | si <i>NEK9</i> -1   | GAGGGAACCTGTATGACAA    |
|                                               | si <i>NEK9</i> -2   | GGACAAGTTGTTTGAGGAA    |
|                                               | si <i>NEK9</i> -3   | GAGGACGTTTGATGCTACA    |
| Target sequences of shRNAs for rat experiment |                     |                        |
| <i>Galnt1</i>                                 | sh <i>Galnt1</i> -1 | TTGGATATGTTCCCTGCTGCTT |
|                                               | sh <i>Galnt1</i> -2 | TGGCGAGTGAGATGATTGCAT  |
|                                               | sh <i>Galnt1</i> -3 | AAGCTCAATTTCCGTTGGTAT  |

NEK9, NIMA related kinase 9.

Table S7 Primers used for qRT-PCR

| Genes                   | Sense (5'-3')                                  | Anti-sense (5'-3')                             |
|-------------------------|------------------------------------------------|------------------------------------------------|
| Primers for human genes |                                                |                                                |
| <i>GAPDH</i>            | GCACCGTCAAGGCTGAGAAC                           | TGGTGAAGACGCCAGTGGA                            |
| <i>GALNT1</i>           | CACCTCCTTGATTTGGGTACTC                         | AGGAATGACGACTGGTTTCCC                          |
| <i>CIGALT1</i>          | TCCTCTGTGGATCAGCAATAGG                         | TTAGGCTGGGTGTCAACCTTT                          |
| <i>GALNT6</i>           | ACAGCGTCCTACACACCAC                            | CTTCTCCTTTAGGTGCTCCTCT                         |
| <i>GALNT8</i>           | TGGGGCGAGGATCTTTCTGA<br>AACCCCTTAGTAAAGAAGAGGC | ATGGTGCGATTGAGAGGCAG                           |
| <i>GCNT1</i>            | G                                              | AGCAGCCTGTCAAGCATTTC<br>GTTGATAGACCTCTTTGCTGGA |
| <i>GCNT3</i>            | TCTGGGCTGCTATATGCTGC                           | A<br>GCAGTGCCAGAATAACAATCT                     |
| <i>NEK9</i>             | GTGGAAGGAAGTCGATTTGACC                         | CA<br>CCATCTTTGGAAGGTTTCAGGT                   |
| <i>IL6</i>              | ACTCACCTCTTCAGAACGAATTG                        | TG                                             |
| <i>CCL2</i>             | CAGCCAGATGCAATCAATGCC                          | TGGAATCCTGAACCCACTTCT                          |
| Primers for rat genes   |                                                |                                                |
| <i>Galnt1</i>           | CAGGAGGACAGTGGTGTGTC                           | GGGGAACAGGATACCAACGG                           |
| <i>Gapdh</i>            | AGTGCCAGCCTCGTCTCATA                           | GATGGTGATGGGTTTCCCGT                           |

GAPDH, glyceraldehyde-3-phosphate dehydrogenase; IL6, interleukin 6; CCL2, C-C motif chemokine ligand 2.
